# Supplementary material for: Synergistic modulation of metal-free photocatalysts by the composition ratio change and heteroatom doping for overall water splitting
Source: Royal Society of Chemistry journal article supplement (doi:10.1039/d1ta01978c), 2021-01-01
Supplement: d1ta01978c1.pdf [file d1ta01978c1.pdf]

# Synergistic modulation of the metal-free photocatalysts by composition ratio change and heteroatom doping for overall water splitting

Jianxiong Tian<sup>†</sup>, Zhaobo Zhou<sup>†</sup>, Sheng Zhang, Zhixia Li, Li Shi<sup>\*</sup>, Qiang Li<sup>\*</sup>, and  
Jinlan Wang<sup>\*</sup>

School of Physics, Southeast University, Nanjing 211189, China

\* E-mail: jlwang@seu.edu.cn.

## 1. Calculation methods of OER activity and adsorption energy of \*O and \*OH

### (1) Calculation method of OER activity

The OER activity is assessed by calculating the reaction free energy of each step based on some thermal corrections:

In our work, the computational hydrogen electrode (CHE) model is applied.<sup>1</sup> At U=0 V,  $\Delta G = \Delta E + \Delta E_{ZPE} - T\Delta S + \int C_p dT + \Delta G_{pH}$ , where  $\Delta E$  is the reaction energy difference between the product and reactant of the OER occurring on catalysts, which can be directly obtained from DFT computations;  $\Delta E_{ZPE}$ ,  $T\Delta S$  and  $\int C_p dT$  are zero-point energy correction, entropy correction and enthalpic temperature correction at T=298.15 K respectively, which can be calculated from the vibrational frequencies.  $\Delta G_{pH}$  is the free energy of correction of pH, which can be calculated by  $\Delta G_{pH} = K_B T \times pH \times \ln 10$ , and the pH value is set to be zero for strong acidic medium

in this work. The  $\Delta E_{ZPE}$ ,  $T\Delta S$  and  $\int C_P dT$  for each reaction intermediates can be calculated by the following equations, respectively:

$$E_{ZPE} = \frac{1}{2} \sum_i h\nu_i \quad (S1)$$

$$-TS = K_B T \sum_i \ln \left( 1 - e^{-\frac{h\nu_i}{K_B T}} \right) - \sum_i h\nu_i \left( \frac{1}{e^{\frac{h\nu_i}{K_B T}} - 1} \right) \quad (S2)$$

$$\int C_P dT = \sum_i h\nu_i \left( \frac{1}{e^{\frac{h\nu_i}{K_B T}} - 1} \right) \quad (S3)$$

In the equations above,  $h$ ,  $\nu$  and  $K_B$  are Planck constant, vibrational frequencies and Boltzmann constant, respectively. Only vibration modes of the adsorbates were taken into account for thermodynamic corrections, assuming that changes in the vibrations of the catalyst surface caused by the presence of the carbon nitrides were minimal.<sup>2, 3</sup> Therefore, the free energy for each step of OER can be calculated by:

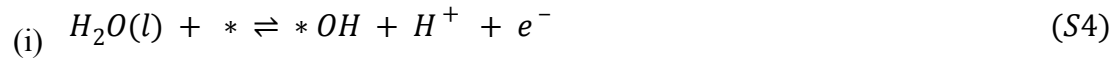

$$\Delta G_1 = G_{*OH} + G_{H^+} + G_{e^-} - G_* - G_{H_2O} = G_{*OH} + \frac{1}{2}G_{H_2} + G_* - G_{H_2O} \quad (S5)$$

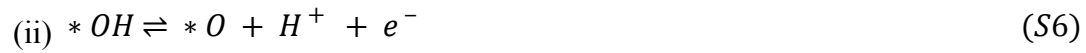

$$\Delta G_2 = G_{*O} + G_{H^+} + G_{e^-} - G_{*OH} = G_{*O} + \frac{1}{2}G_{H_2} - G_{*OH} \quad (S7)$$

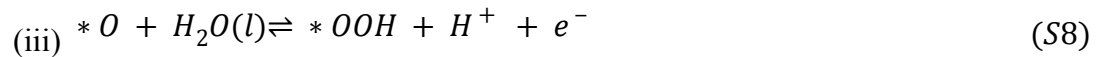

$$\Delta G_3 = G_{*OOH} + G_{H^+} + G_{e^-} - G_{*O} - G_{H_2O} = G_{*OOH} + \frac{1}{2}G_{H_2} - G_{*O} - G_{H_2O} \quad (S9)$$

(iv)

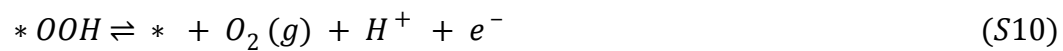

$$\Delta G_4 = 4.92 - \Delta G_1 - \Delta G_2 - \Delta G_3 \quad (S11)$$

The overpotential, which is determined by the rate determining step, is calculated by the formula:

$$\eta = \max[\Delta G_1, \Delta G_2, \Delta G_3, \Delta G_4] / e - 1.23 \quad (S12)$$

(2) Calculation method of adsorption energy of \*O and \*OH

The adsorption energies of \*O and \*OH are obtained as follows:

$$\Delta E_{OH} = E_{*OH} - E_* - (E_{H_2O} - \frac{1}{2}E_{H_2}) \quad (S13)$$

$$\Delta E_O = E_{*O} - E_* - (E_{H_2O} - E_{H_2}) \quad (S14)$$

In (S13) and (S14),  $\Delta E_{OH}$  and  $\Delta E_O$  are the adsorption energy of OH and O and  $E_{*OH}$ ,  $E_*$  and  $E_*$  are the energies of a clean catalyst and the catalyst adsorbed with OH, O and OOH, respectively.  $E_{H_2O}$  and  $E_{H_2}$  is the energy calculated via DFT.

## 2. Figures

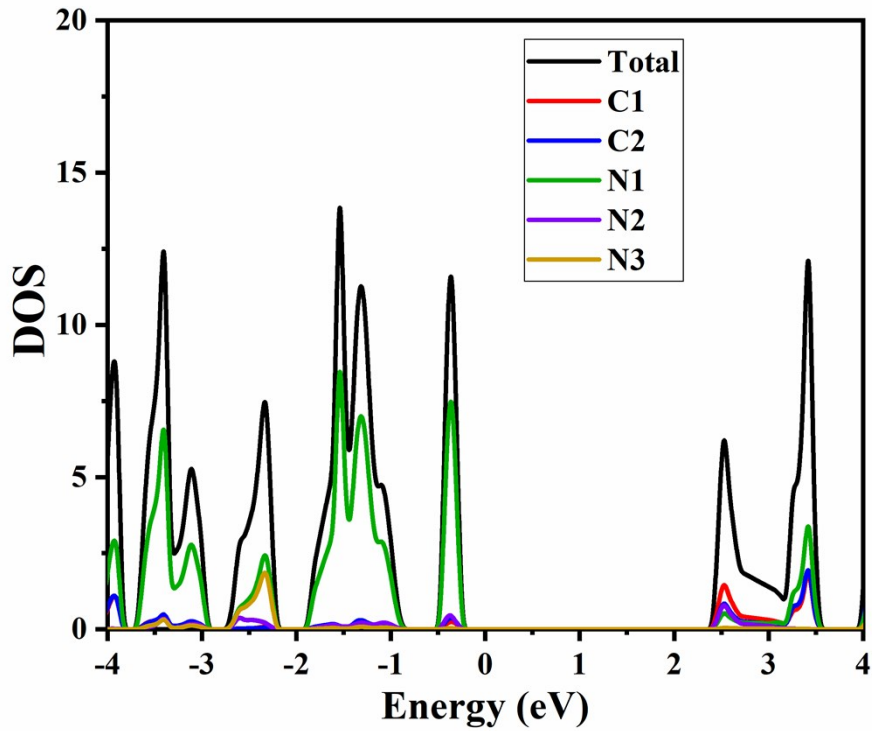

**Fig. S1.** The projected density of states of g-C<sub>3</sub>N<sub>4</sub> relative to Fermi level by HSE06.

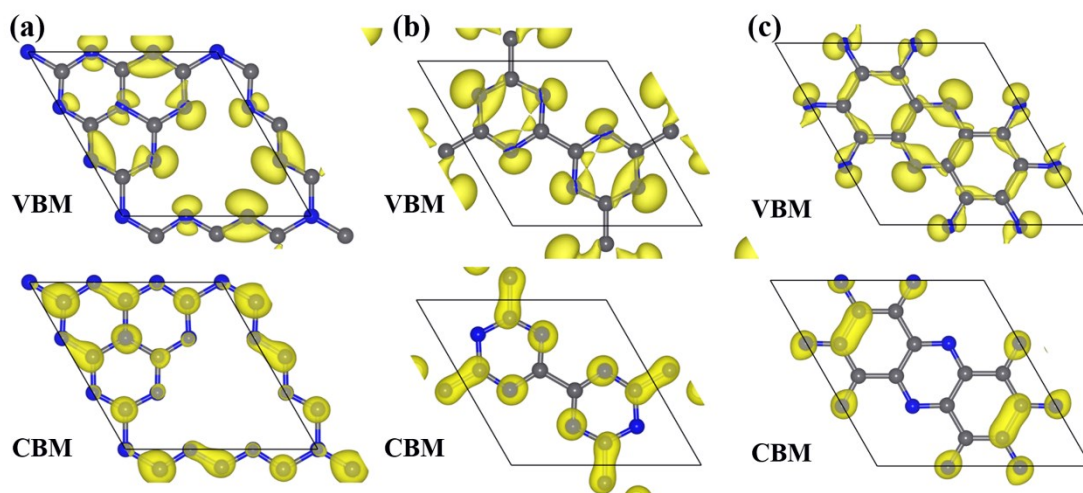

**Fig. S2.** Charge density distributions of valence band maximum (VBM) and conduction band minimum (CBM) for (a) g-C<sub>3</sub>N<sub>4</sub>, (b) g-C<sub>3</sub>N<sub>3</sub> and (c) g-C<sub>2</sub>N, respectively. The isosurface value is 0.007 e/Bohr<sup>3</sup>.

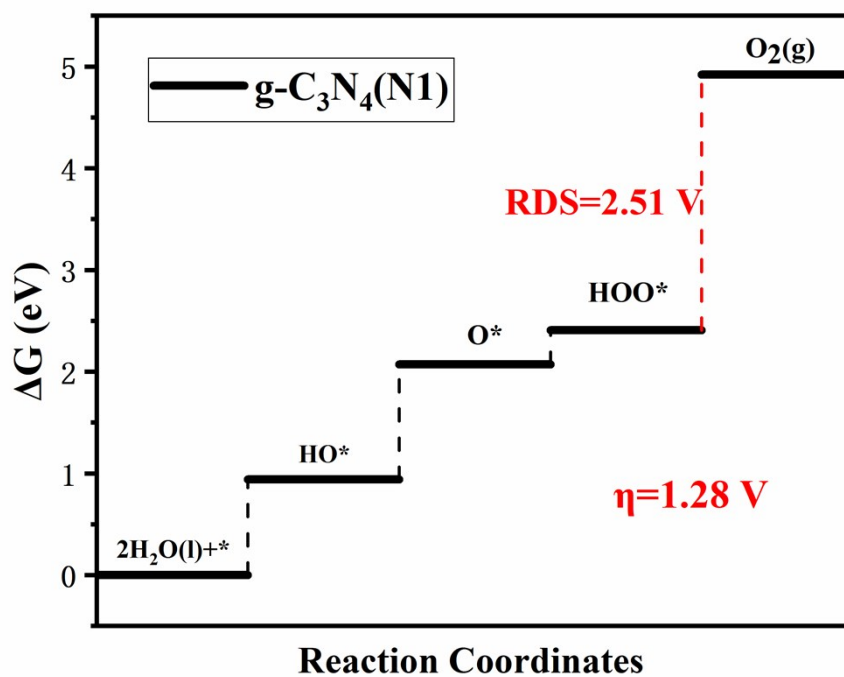

**Fig. S3.** Free energy diagram of pristine g-C<sub>3</sub>N<sub>4</sub> on N1 site at zero potential ( $U=0$ ), where the rate determining step is marked by dashed line in red.

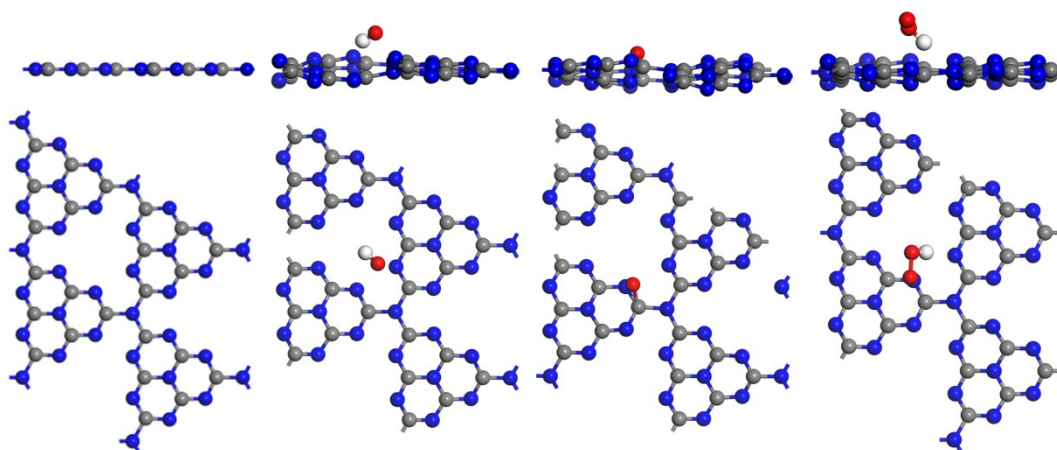

**Fig. S4.** Optimized structures of reaction intermediates of pristine  $g\text{-C}_3\text{N}_4$  on N1 site during OER, where gray, blue, red, yellow balls represent C, N, O and S atoms, respectively.

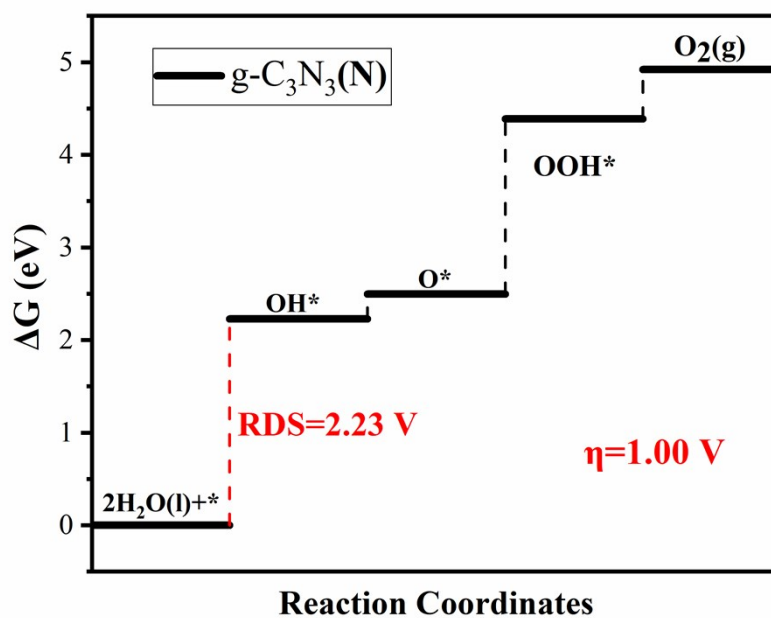

**Fig. S5.** Free energy diagram of pristine  $g\text{-C}_3\text{N}_3$  on N site at zero potential ( $U=0$ ), where the rate determining step is marked by dashed line in red.

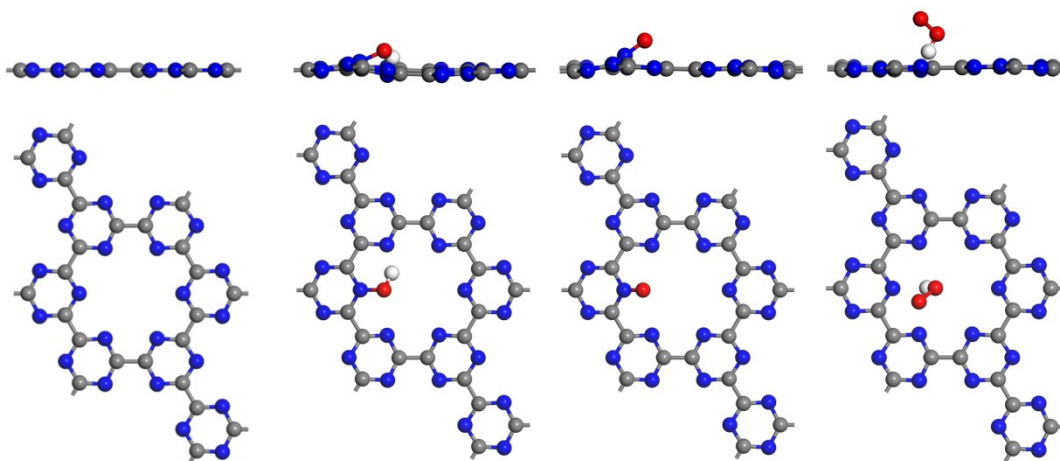

Fig. S6. Optimized structures of reaction intermediates of pristine g-C<sub>3</sub>N<sub>3</sub> on N site during OER.

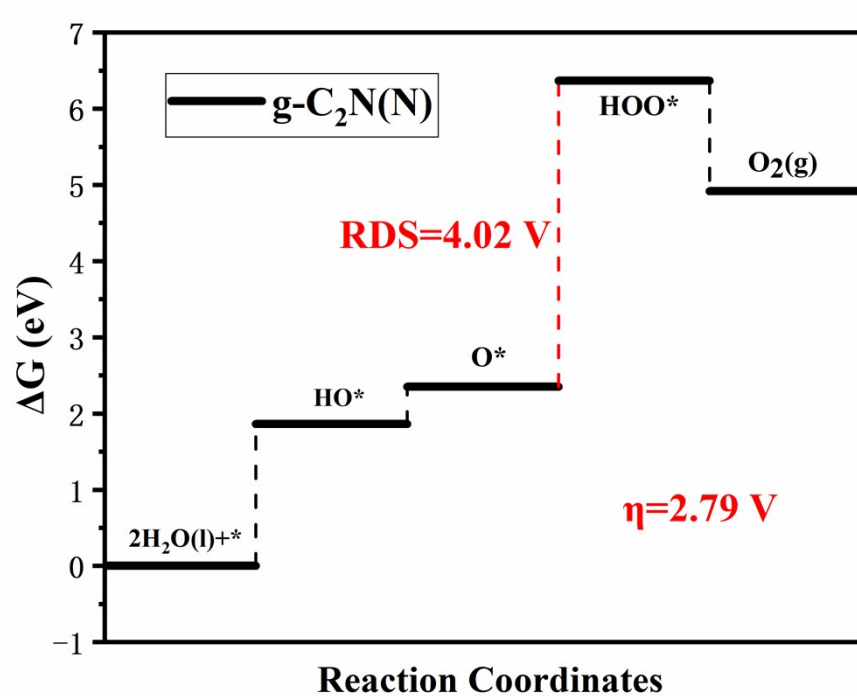

Fig. S7. Free energy diagram of pristine g-C<sub>2</sub>N on N site at zero potential (U=0), where the rate determining step is marked by dashed line in red.

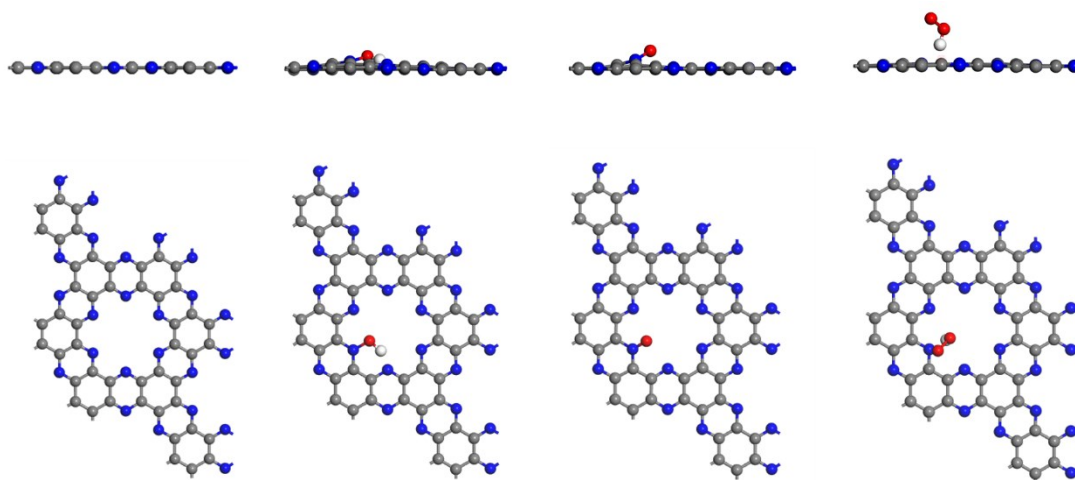

**Fig. S8.** Optimized structures of reaction intermediates of pristine g-C<sub>2</sub>N on N site during OER.

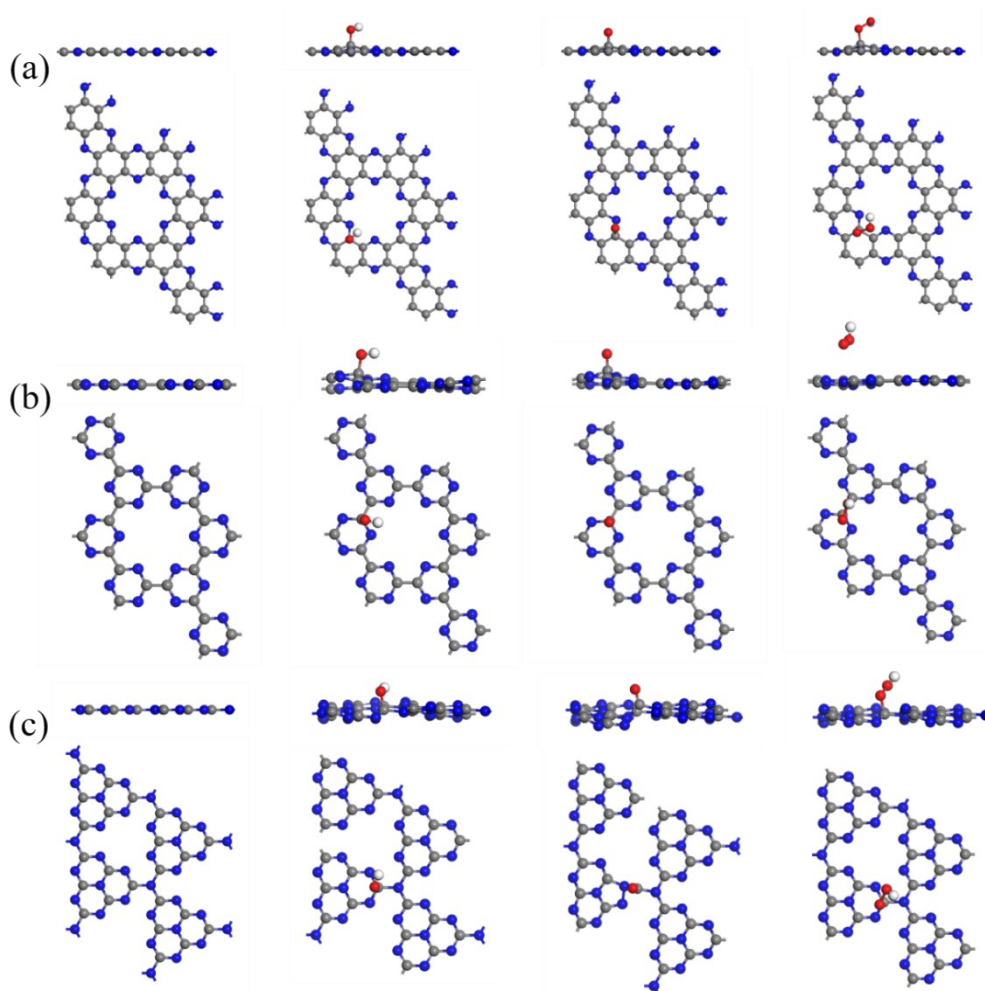

**Fig. S9.** Optimized structures of reaction intermediates of pristine (a) g-C<sub>2</sub>N, (b) g-C<sub>3</sub>N<sub>3</sub> and (c) g-C<sub>3</sub>N<sub>4</sub> during OER.

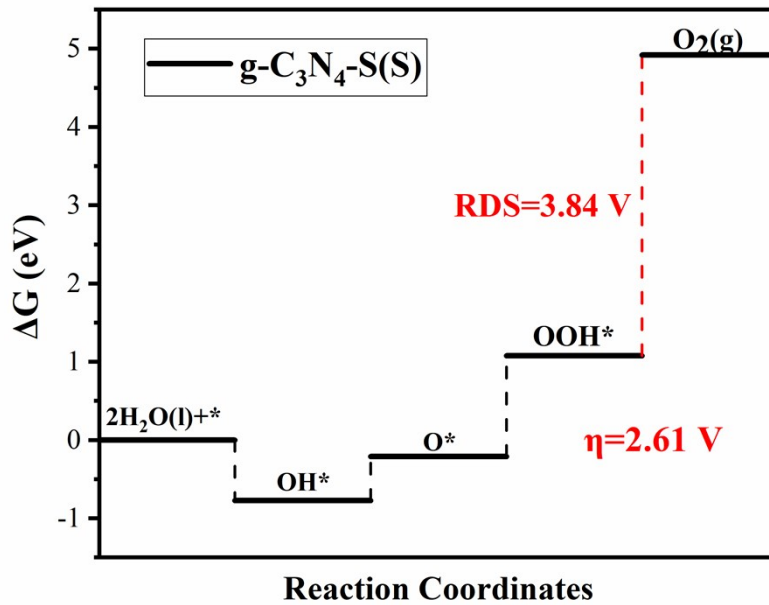

**Fig. S10.** Free energy diagram of S-doped  $g\text{-C}_3\text{N}_4$  on S site at zero potential ( $U=0$ ), where the rate determining step is marked by dashed line in red.

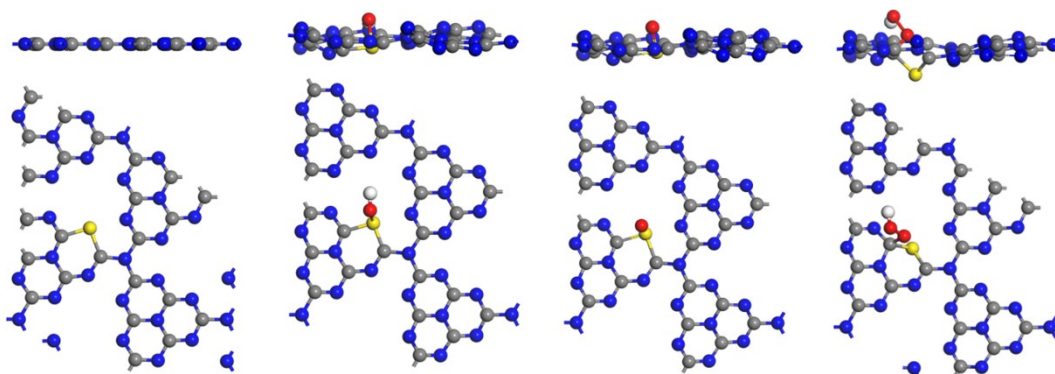

**Fig. S11.** Optimized structures of reaction intermediates of S-doped  $g\text{-C}_3\text{N}_4$  on S site during OER.



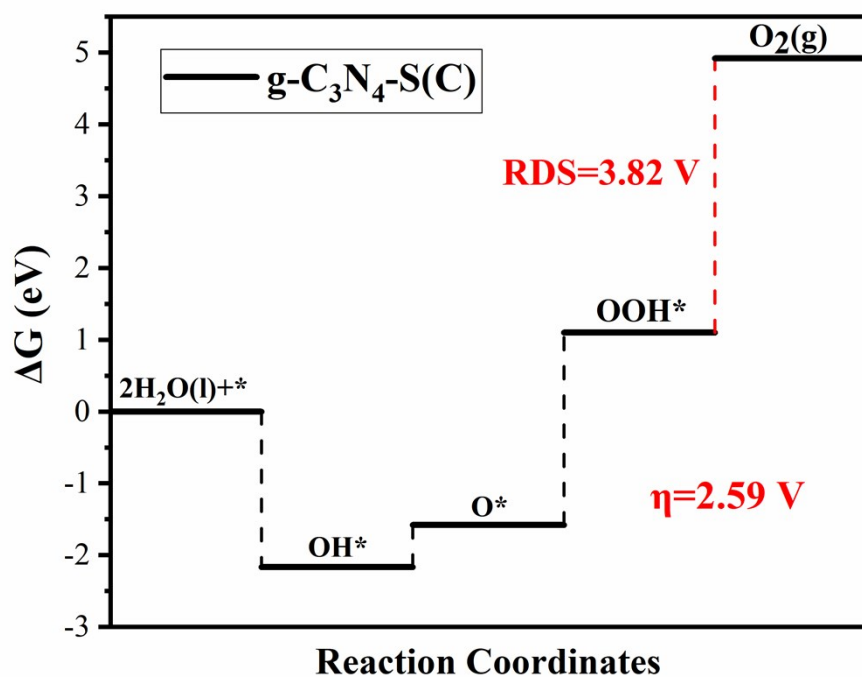

**Fig. S12.** Free energy diagram of S-doped g-C<sub>3</sub>N<sub>4</sub> on C site at zero potential ( $U=0$ ), where the rate determining step is marked by dashed line in red.

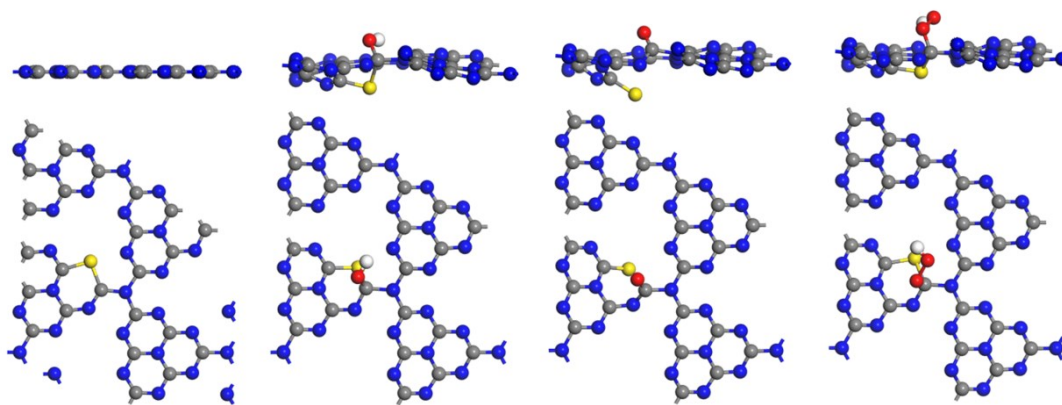

**Fig. S13.** Optimized structures of reaction intermediates of S-doped g-C<sub>3</sub>N<sub>4</sub> on C site during OER.

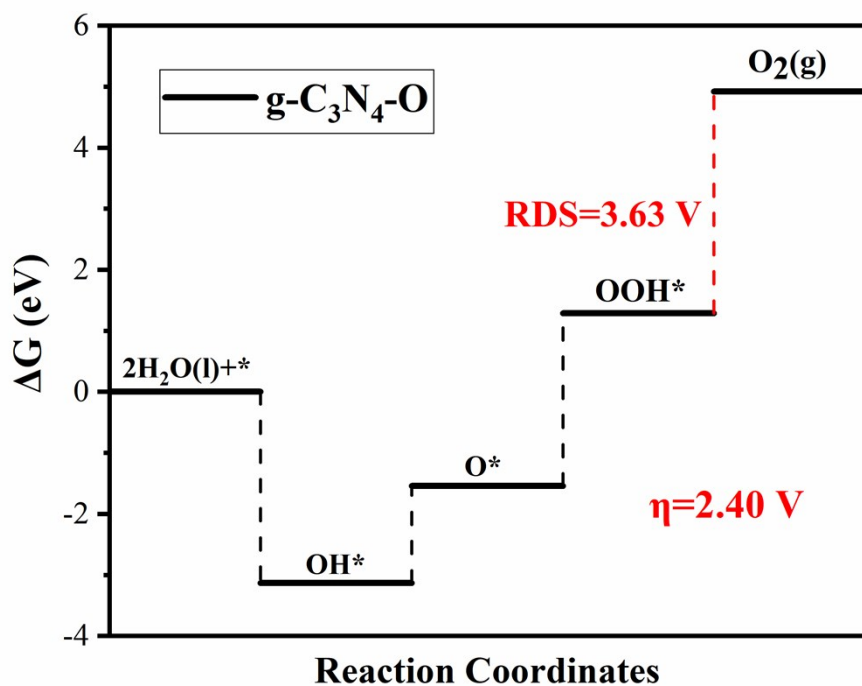

**Fig. S14.** Free energy diagram of O-doped g-C<sub>3</sub>N<sub>4</sub> on C site at zero potential ( $U=0$ ), where the rate determining step is marked by dashed line in red.

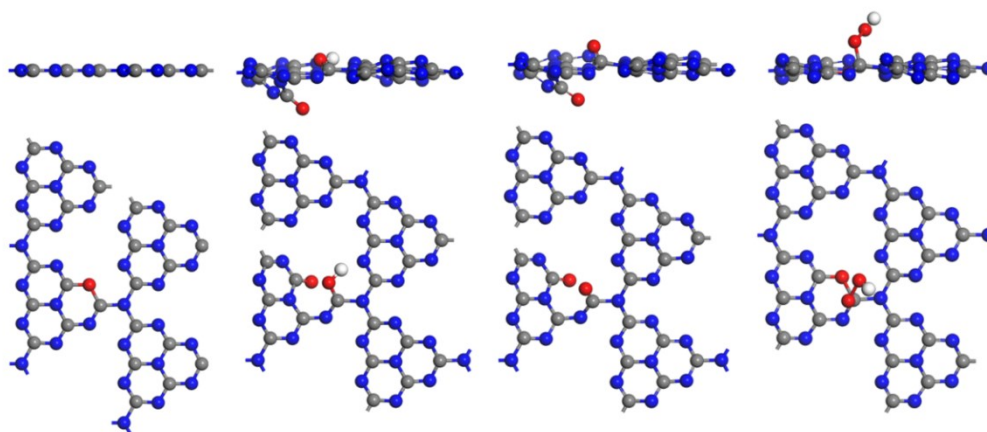

**Fig. S15.** Optimized structures of reaction intermediates of O-doped g-C<sub>3</sub>N<sub>4</sub> on C site during OER.

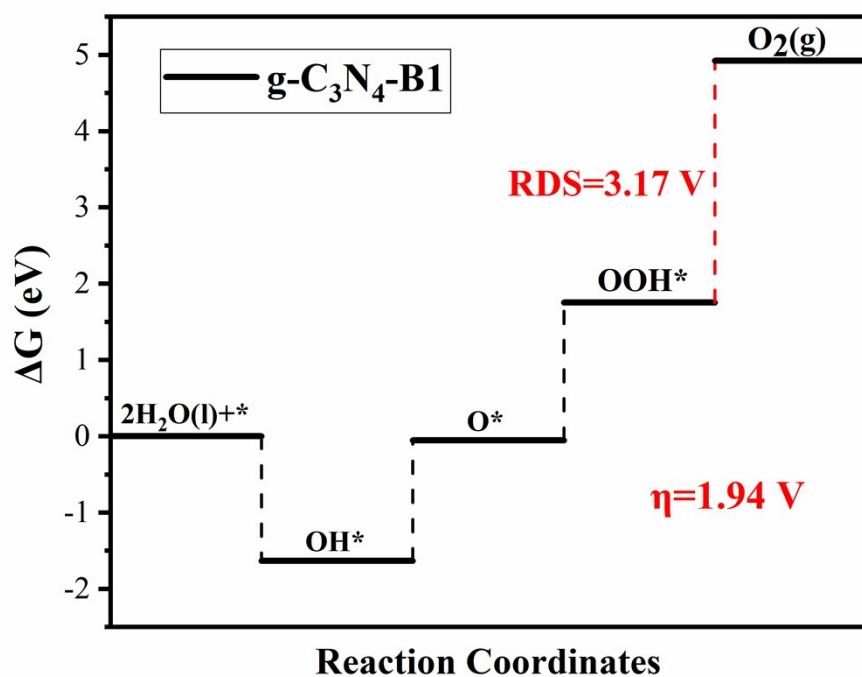

**Fig. S16.** Free energy diagram of B1-doped g-C<sub>3</sub>N<sub>4</sub> on B1 site at zero potential ( $U=0$ ), where the rate determining step is marked by dashed line in red.

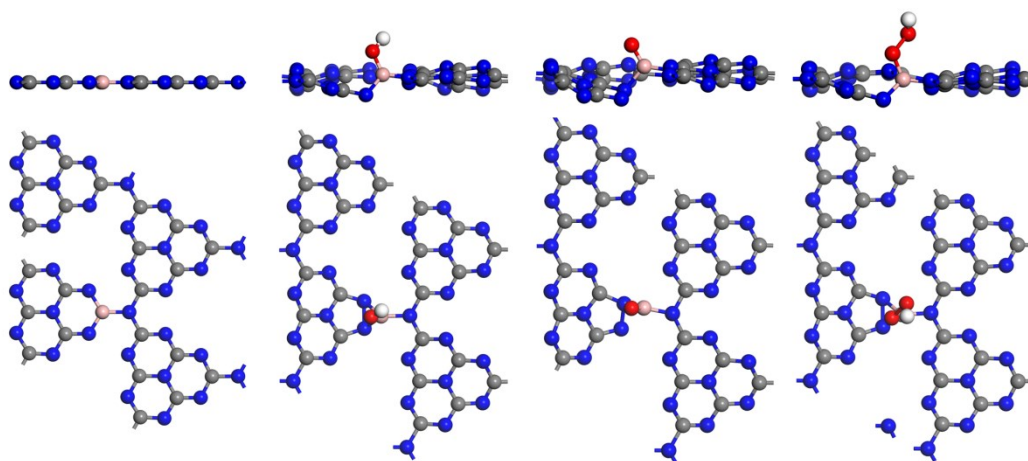

**Fig. S17.** Optimized structures of reaction intermediates of B1-doped g-C<sub>3</sub>N<sub>4</sub> on B1 site during OER.

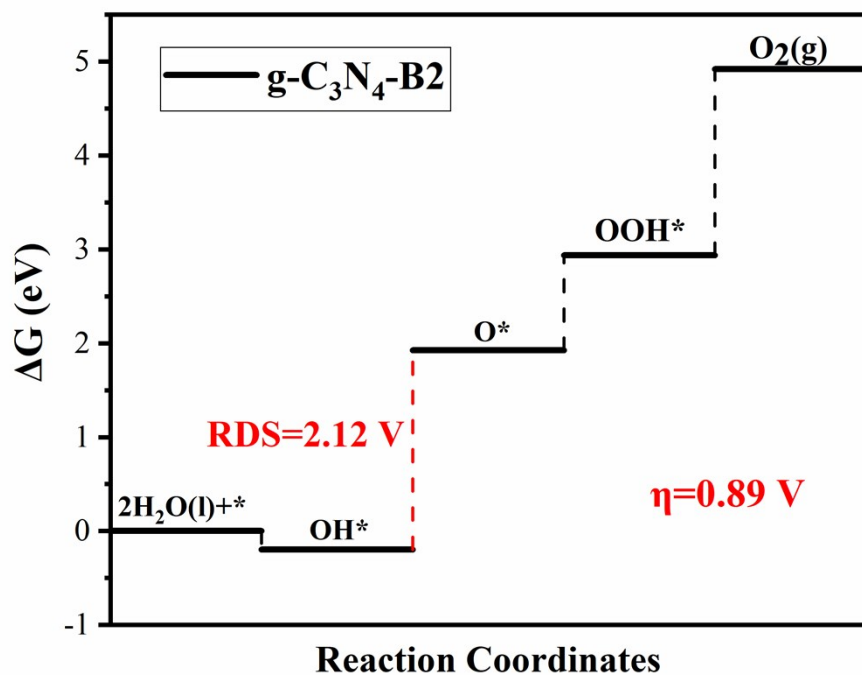

**Fig. S18.** Free energy diagram of B2-doped g-C<sub>3</sub>N<sub>4</sub> on B2 site at zero potential ( $U=0$ ), where the rate determining step is marked by dashed line in red.

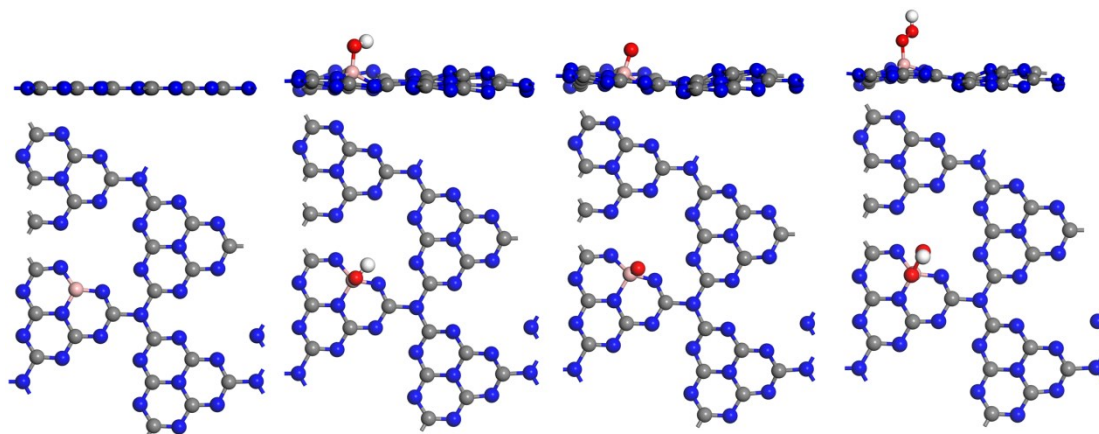

**Fig. S19.** Optimized structures of reaction intermediates of B2-doped g-C<sub>3</sub>N<sub>4</sub> on B2 site during OER.

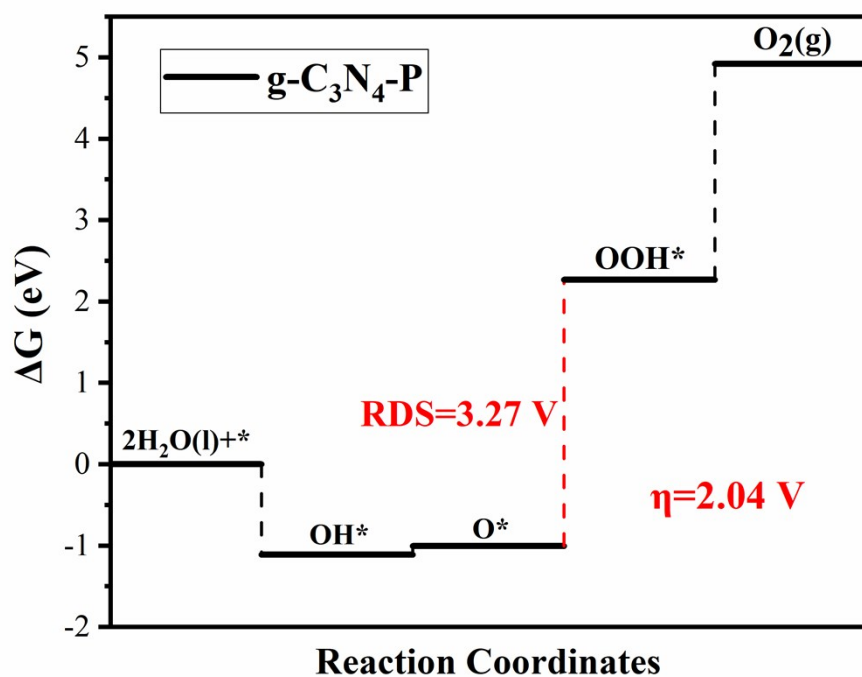

**Fig. S20.** Free energy diagram of P-doped g-C<sub>3</sub>N<sub>4</sub> on P site at zero potential ( $U=0$ ), where the rate determining step is marked by dashed line in red.

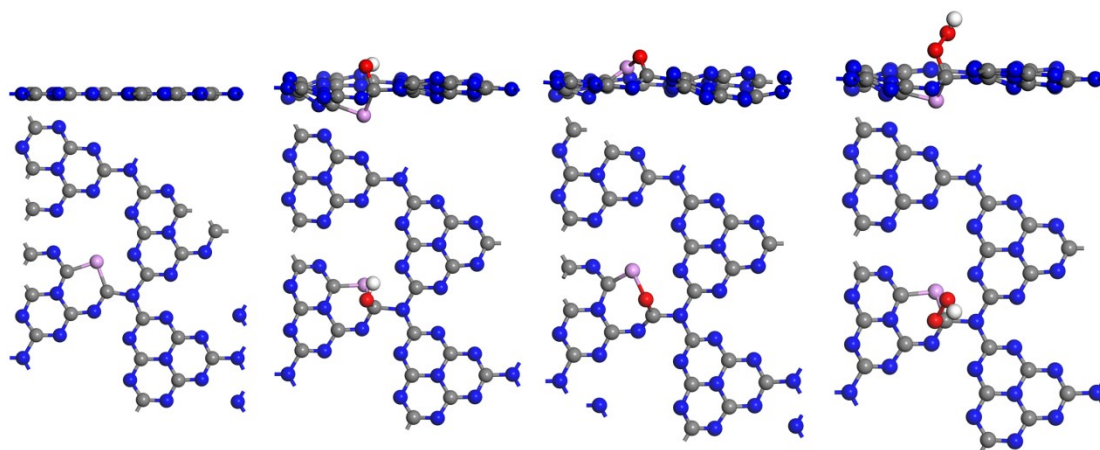

**Fig. S21.** Optimized structures of reaction intermediates of P-doped g-C<sub>3</sub>N<sub>4</sub> on P site during OER.

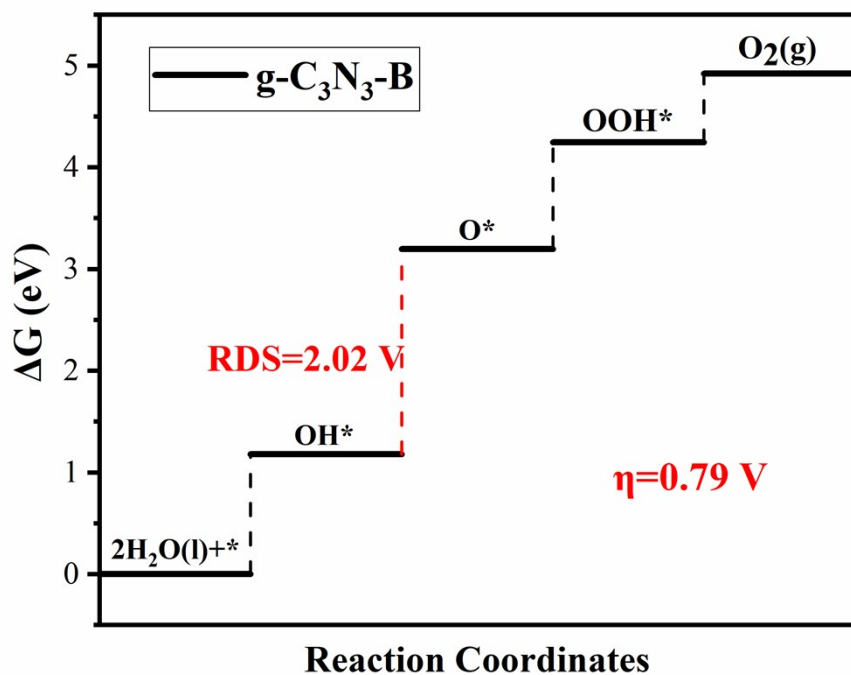

**Fig. S22.** Free energy diagram of B-doped  $g\text{-C}_3\text{N}_3$  on B site. at zero potential ( $U=0$ ), where the rate determining step is marked by dashed line in red.

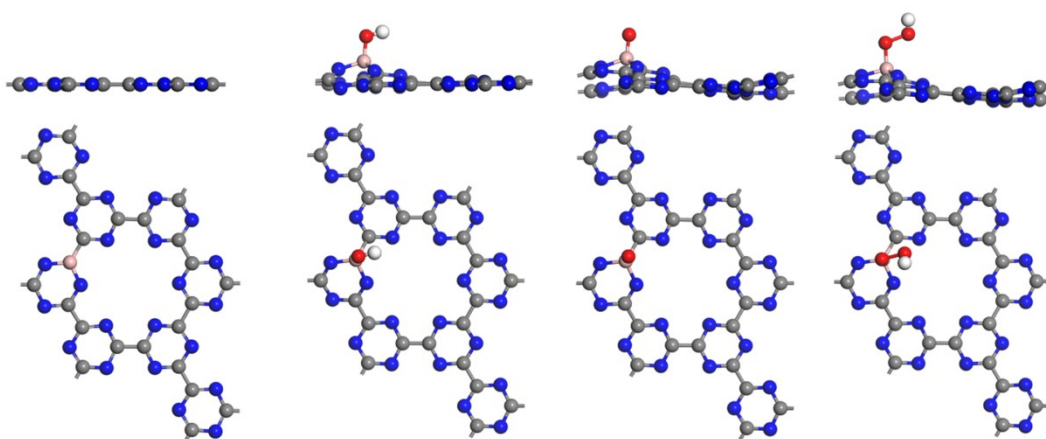

**Fig. S23.** Optimized structures of reaction intermediates of B-doped  $g\text{-C}_3\text{N}_3$  on B site during OER.

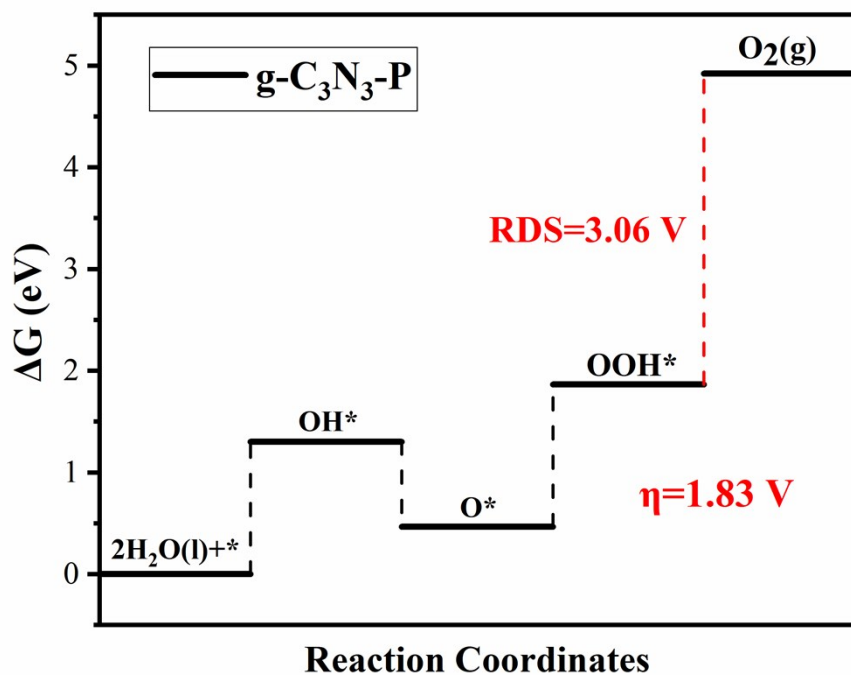

**Fig. S24.** Free energy diagram of P-doped g-C<sub>3</sub>N<sub>3</sub> on C site. at zero potential ( $U=0$ ), where the rate determining step is marked by dashed line in red.

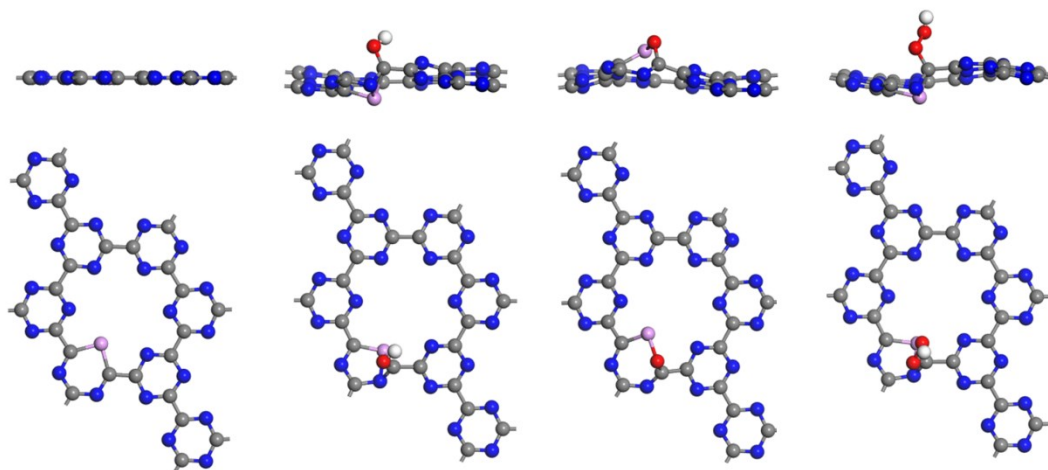

**Fig. S25.** Optimized structures of reaction intermediates of P-doped g-C<sub>3</sub>N<sub>4</sub> on C site during OER.

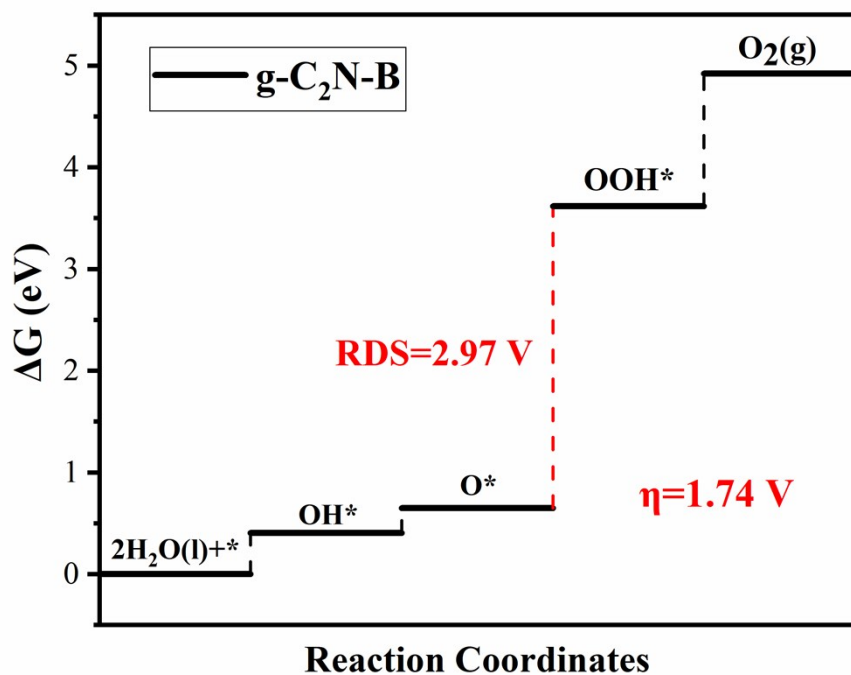

**Fig. S26.** Free energy diagram of B-doped g-C<sub>2</sub>N on B site. at zero potential (U=0), where the rate determining step is marked by dashed line in red.

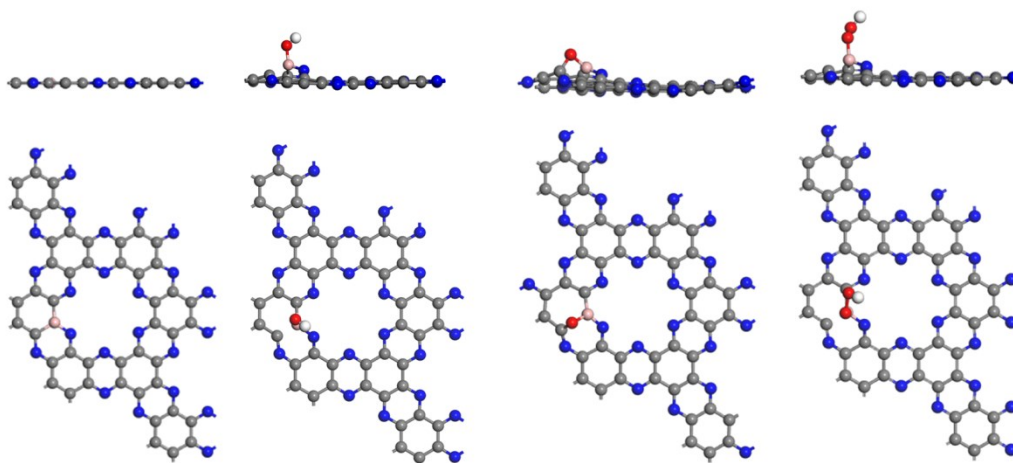

**Fig. S27.** Optimized structures of reaction intermediates of B-doped g-C<sub>2</sub>N on B site during OER.



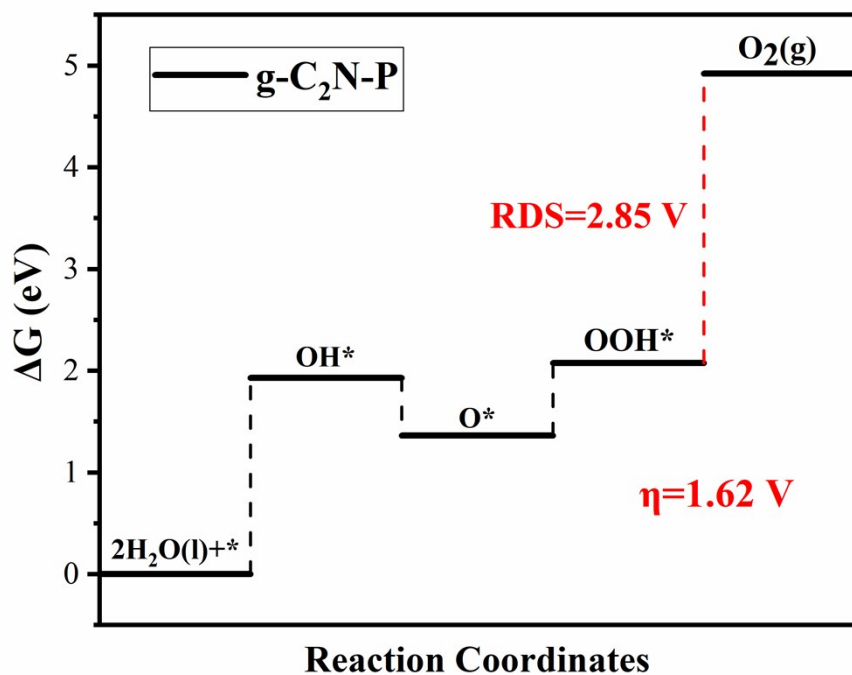

**Fig. S28.** Free energy diagram of P-doped g-C<sub>2</sub>N on C site at zero potential ( $U=0$ ), where the rate determining step is marked by dashed line in red.

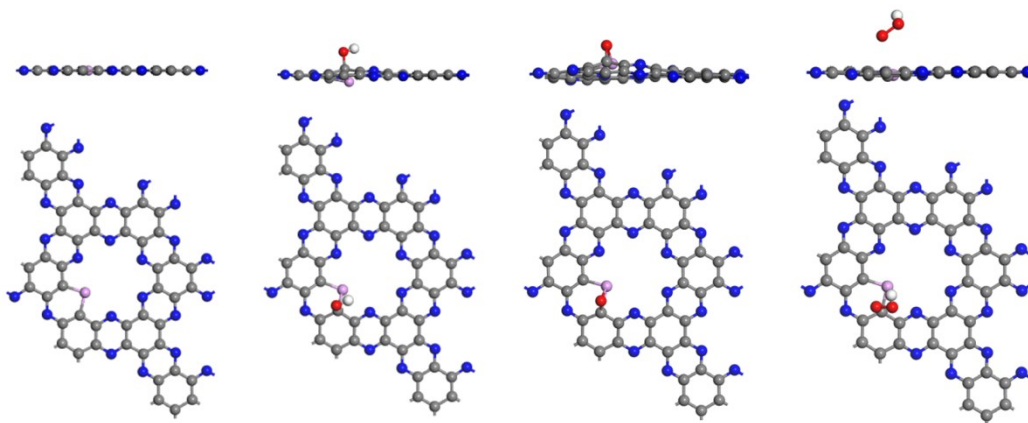

**Fig. S29.** Optimized structures of reaction intermediates of P-doped g-C<sub>2</sub>N on C site during OER.

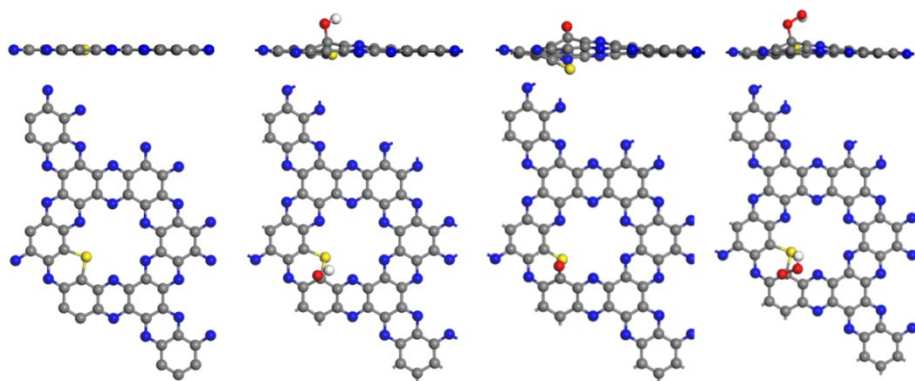

**Fig. S30.** Optimized structures of reaction intermediates of S-doped g-C<sub>2</sub>N on C site during OER.

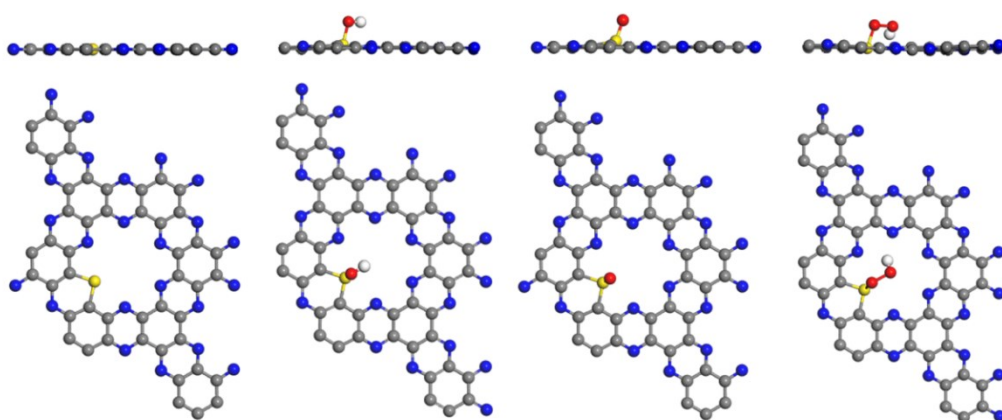

**Fig. S31.** Optimized structures of reaction intermediates of S-doped g-C<sub>2</sub>N on S site during OER.

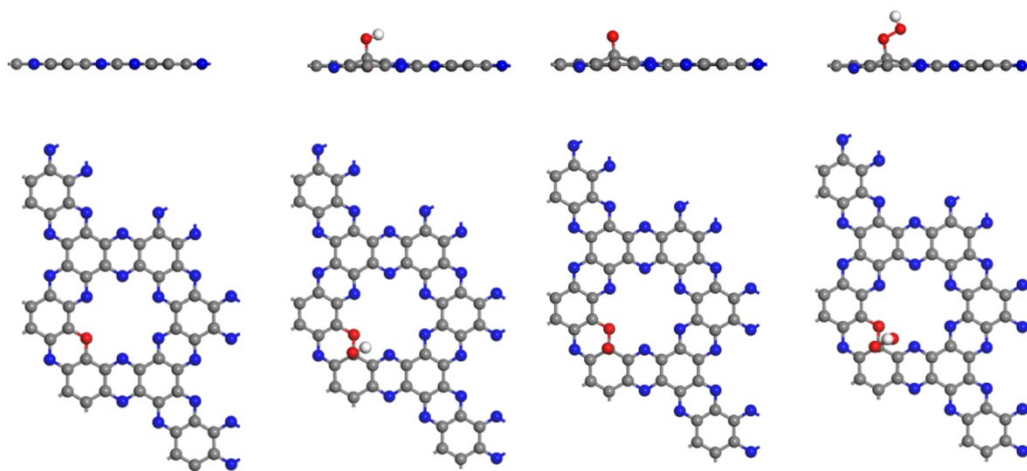

**Fig. S32.** Optimized structures of reaction intermediates of O-doped g-C<sub>2</sub>N on C site during OER.

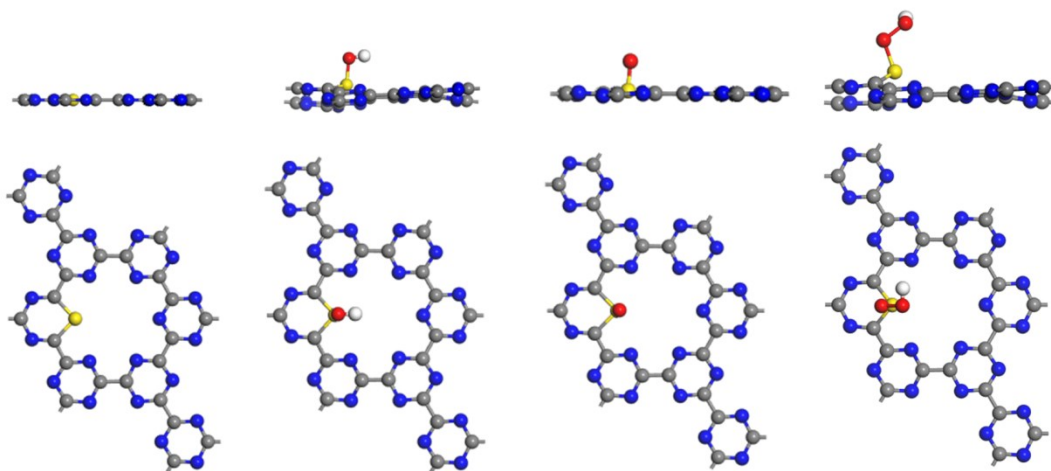

**Fig. S33.** Optimized structures of reaction intermediates of S-doped g-C<sub>3</sub>N<sub>3</sub> on S site during OER.

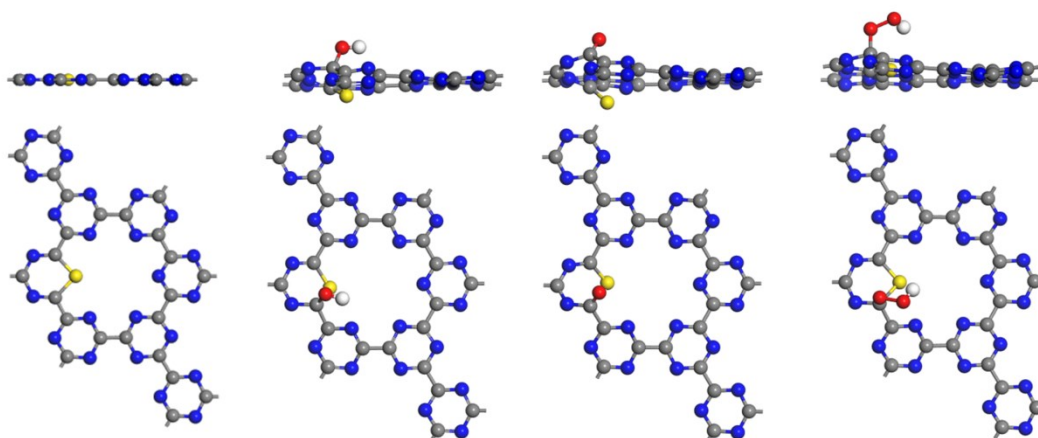

**Fig. S34.** Optimized structures of reaction intermediates of S-doped g-C<sub>3</sub>N<sub>3</sub> on C site during OER.

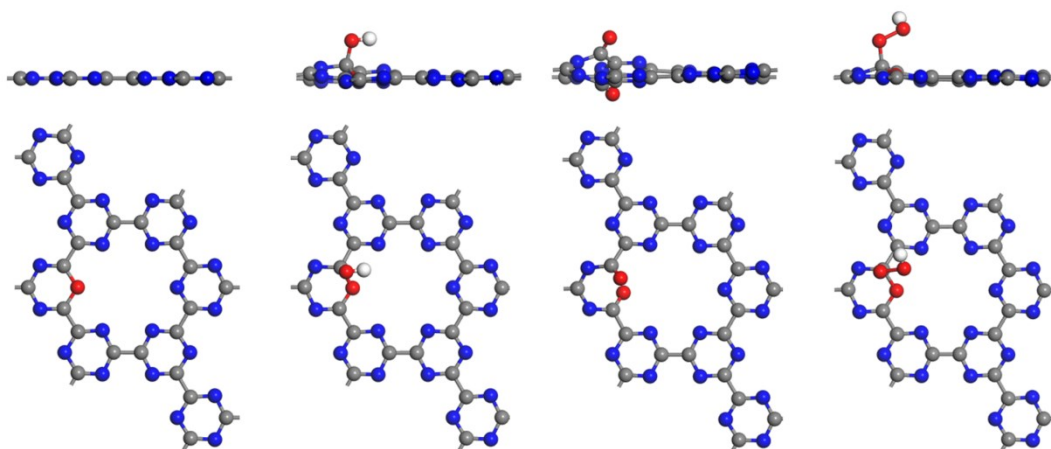

**Fig. S35.** Optimized structures of reaction intermediates of O-doped g-C<sub>3</sub>N<sub>3</sub> on C site during OER.

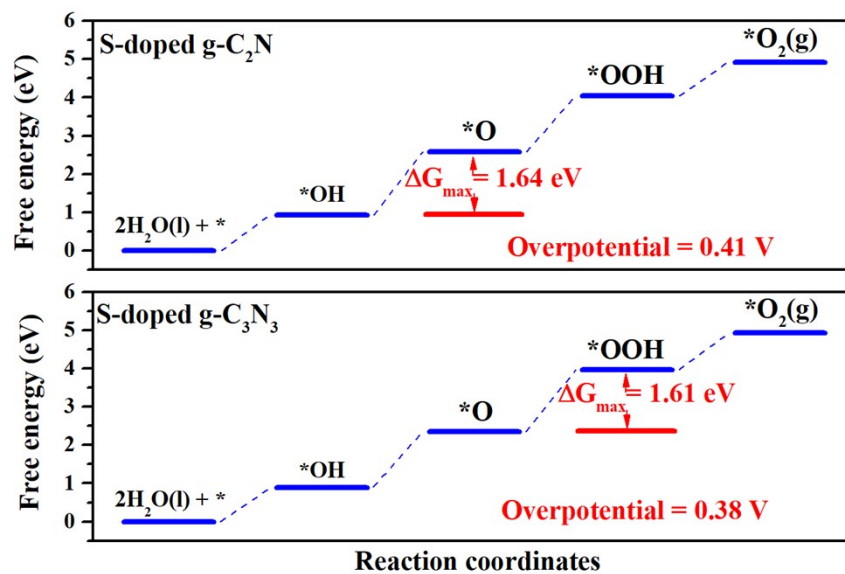

Fig. S36. Free energy diagrams of OER on S-doped  $g\text{-C}_2\text{N}$  and  $g\text{-C}_3\text{N}_3$  with lower doping concentration.

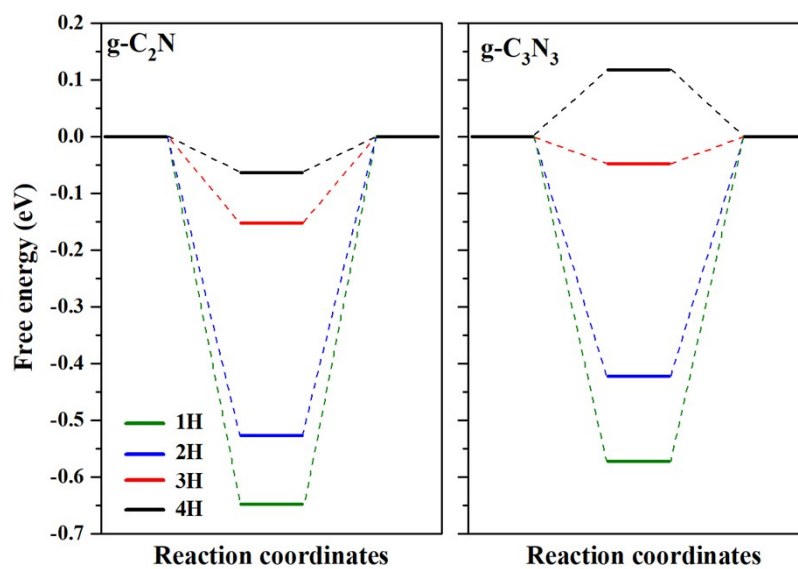

Fig. S37. Free energy difference with different hydrogen coverages on the N sites of  $g\text{-C}_2\text{N}$  and  $g\text{-C}_3\text{N}_3$ .

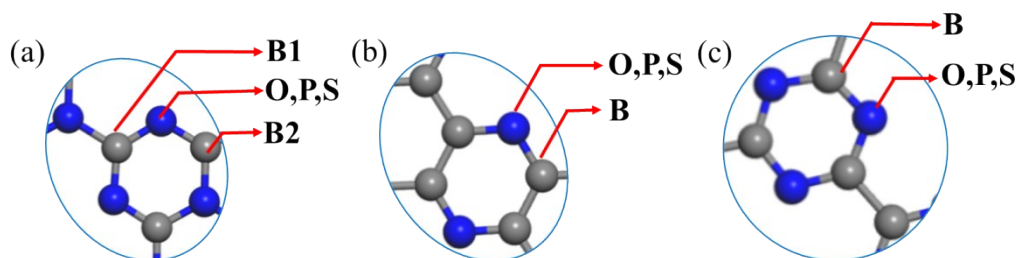

**Fig. S38.** Doping sites of (a)  $g\text{-C}_3\text{N}_4$ , (b)  $g\text{-C}_3\text{N}_3$  and (c)  $g\text{-C}_2\text{N}$ . For  $g\text{-C}_3\text{N}_4$ , the doping site of O, P and S atom is on N1 atom, and the doping site of B is on C1 or C2; For  $g\text{-C}_3\text{N}_3$  and  $g\text{-C}_2\text{N}$ , the doping site of O, P and S is on N and the doping site of B is on C.

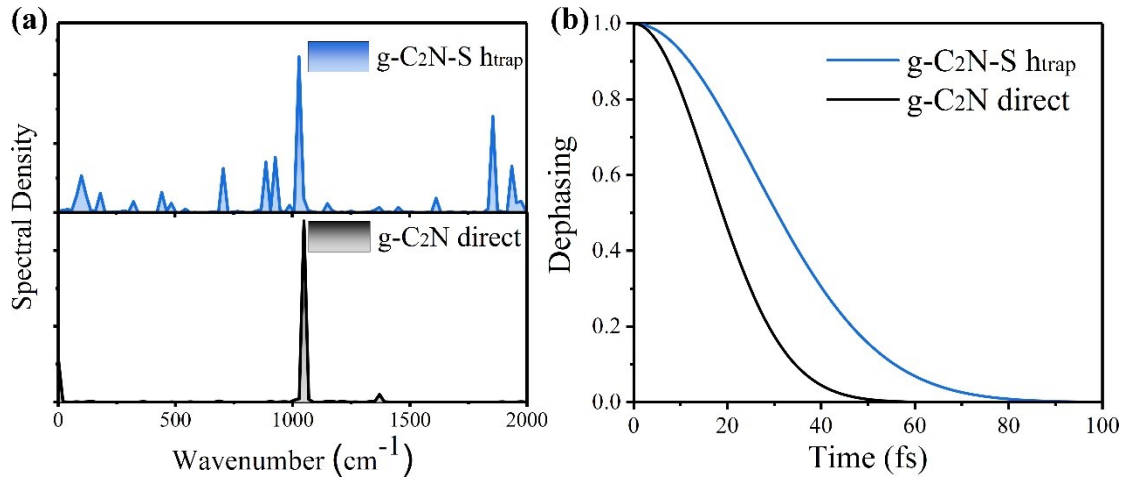

**Fig. S39.** (a) Fourier transforms of the energy gaps between donor and acceptor states of hole trap and direct e-h recombination dynamics for S-doped  $g\text{-C}_2\text{N}$ . (b) Pure-dephasing functions of hole trap and direct e-h recombination for S-doped  $g\text{-C}_2\text{N}$ .

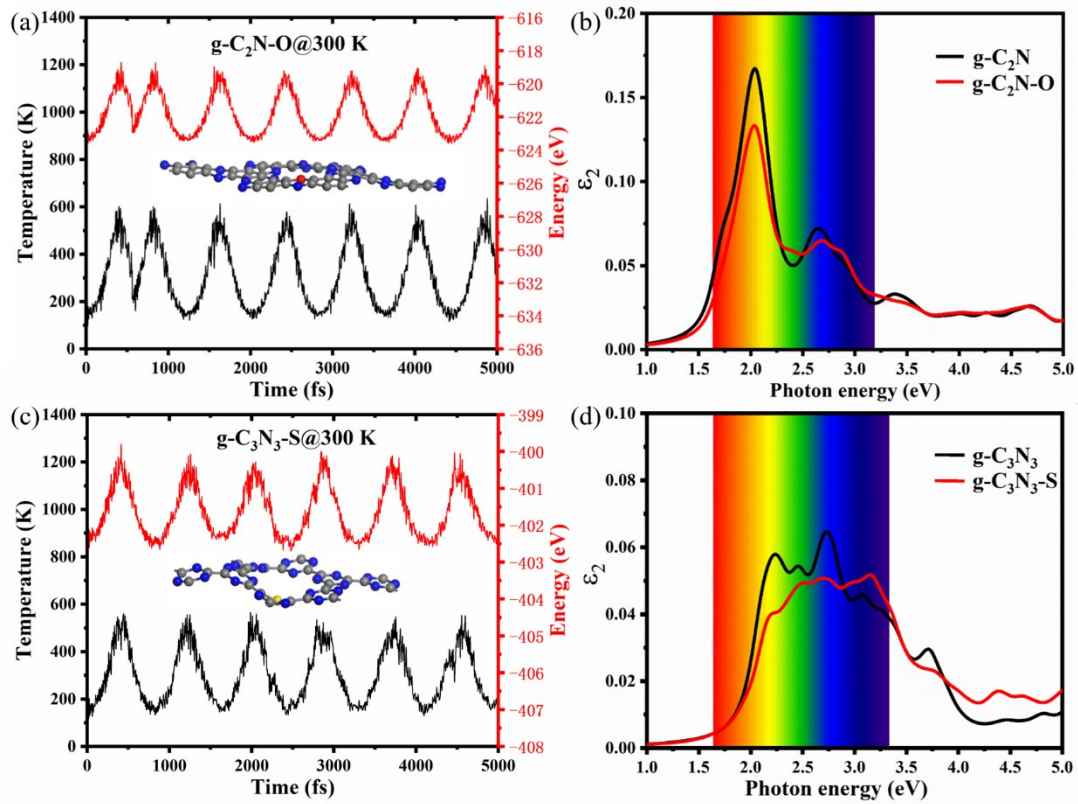

**Fig. S40.** Energy and temperature fluctuations and one of structures of (a) O-doped g-C<sub>2</sub>N and (c) S-doped g-C<sub>3</sub>N<sub>3</sub> during 5000 fs; Optical spectrum of (b) pristine g-C<sub>2</sub>N and O-doped g-C<sub>2</sub>N and (d) pristine g-C<sub>3</sub>N<sub>3</sub> and S-doped g-C<sub>3</sub>N<sub>3</sub>.

1. A. A. Peterson, F. Abild-Pedersen, F. Studt, J. Rossmeisl and J. K. Nørskov, *Energy & Environmental Science*, 2010, **3**, 1311.
2. C. Ling, L. Shi, Y. Ouyang, X. C. Zeng and J. Wang, *Nano Letters*, 2017, **17**, 5133-5139.
3. X. Bai, Q. Li, L. Shi, X. Niu, C. Ling and J. Wang, *Small*, 2020, **16**, 1901981.
